# Supplementary material for: Coupling pretreatment of ultraviolet/ferrate (UV/Fe(vi)) for improving the ultrafiltration of natural surface water
Source: Royal Society of Chemistry journal article supplement (doi:10.1039/d3ra05582e), 2024-01-01
Supplement: d3ra05582e1.pdf [file d3ra05582e1.pdf]

Supporting information for *RSC Advances*

## Coupling pretreatment of ultraviolet/ferrate (UV/Fe(VI)) for improving ultrafiltration of natural surface water

Fuwang Zhao<sup>a</sup>, Zhiwei Zhou<sup>b\*</sup>

<sup>a</sup>*School of Energy and Environment, Zhong Yuan University of Technology, Zhengzhou, 450007, China.*

<sup>b</sup>*College of Architecture & Civil Engineering, Faculty of Urban Construction, Beijing University of Technology, Beijing 100124, China*

\*Author for correspondence: E-mail address: [zhouzw@bjut.edu.cn](mailto:zhouzw@bjut.edu.cn);

**Text S1.** The details of Darcy's formula and model fitting of membrane fouling.

Darcy's law was adopted to calculate the fouling resistance, which was illustrated as Eqs. (1)-(2):

$$R_{rf} = \frac{\Delta P}{\mu J_1} - \frac{\Delta P}{\mu J_2} \quad (1)$$

$$R_{if} = \frac{\Delta P}{\mu J_2} - \frac{\Delta P}{\mu J_0} \quad (2)$$

where  $R_{rf}$  and  $R_{if}$  are reversible and irreversible membrane fouling resistance ( $\text{m}^{-1}$ ), respectively.  $J_0$ ,  $J_1$  and  $J_2$  are flux ( $\text{m/s}$ ) for Milli-Q water of virgin membrane, water sample, and Milli-Q water of membrane after backwashing, respectively.  $\Delta P$  represents transmembrane pressure (Pa) and  $\mu$  is dynamic viscosity ( $\text{Pa}\cdot\text{s}$ ).

To be specific, four fouling models were employed to recognize the dominant mechanism during the UF process. According to Hermia's model, the fouling mechanisms are consistent with the characteristic curves between  $d^2t/dV^2$  and  $dt/dV$  (Eq. (1)).

$$\frac{d^2t}{dV^2} = k \left( \frac{dt}{dV} \right)^n \quad (1)$$

where  $t$  is filtration time (s),  $V$  is filtration volume ( $\text{m}^3$ ), and  $n$  is characteristic value for each fouling model (Table S1). The required  $d^2t/dV^2$ ,  $dt/dV$ , and  $n$  can be calculated according to Eqs. (2)-(4).

$$\frac{dt}{dV} = \frac{1}{JA} \quad (2)$$

$$\frac{d^2t}{dV^2} = -\frac{1}{J^3 A^2} \frac{dJ}{dt} \quad (3)$$

$$n = \frac{d \left[ \log \left( \frac{d^2t}{dV^2} \right) \right]}{d \left[ \log \left( \frac{dt}{dV} \right) \right]} \quad (4)$$

where  $J$  and  $A$  represent permeate flux (m/s) and filtration area (m<sup>2</sup>), respectively.

**Table S1.** Four classical membrane fouling models.

| Values of n | Fouling mechanism     | Computational formula    |
|-------------|-----------------------|--------------------------|
| 2.0         | Complete blocking     | $J_0 - J = C_1V$         |
| 1.5         | Standard blocking     | $1/t + C_2 = J_0/V$      |
| 1.0         | Intermediate blocking | $\ln J_0 - \ln J = C_3V$ |
| 0.0         | Cake layer filtration | $(1/J) - (1/J_0) = C_4V$ |

Notes:  $J_0$  is initial membrane flux;  $J$  is membrane flux;  $V$  is filtration volume;  $t$  is filtration time;  $C_1$ ,  $C_2$ ,  $C_3$ , and  $C_4$  are constants.

**Table S2.** The changes of DOC under different pretreatment conditions.

| Samples (Influent)                                 | DOC (mg/L) |
|----------------------------------------------------|------------|
| Feed water                                         | 7.553      |
| 0.02 mmol/L Fe(VI) with 30 minutes UV irradiation  | 5.994      |
| 0.04 mmol/L Fe(VI) with 60 minutes UV irradiation  | 5.524      |
| 0.06 mmol/L Fe(VI) with 90 minutes UV irradiation  | 5.223      |
| 0.08 mmol/L Fe(VI) with 90 minutes UV irradiation  | 5.407      |
| 0.06 mmol/L Fe(VI) with 120 minutes UV irradiation | 5.396      |
| 0.08 mmol/L Fe(VI) with 120 minutes UV irradiation | 5.461      |

**Table S3.** Summary of equations in the UV/Fe(VI) process.

| Eq. | Reaction                                                                                   | Rate constant (M <sup>-1</sup> ·s <sup>-1</sup> ) | Reference |
|-----|--------------------------------------------------------------------------------------------|---------------------------------------------------|-----------|
| (1) | $\text{Fe(VI)} + \text{H}_2\text{O} \rightarrow \text{Fe(IV)} + \text{H}_2\text{O}_2$      | 22                                                | 1         |
| (2) | $\text{H}_2\text{O}_2 + \text{UV} \rightleftharpoons 2 \cdot \text{OH}$                    | $5.5 \times 10^9$                                 | 2         |
| (3) | $\text{H}_2\text{O}_2 + \cdot \text{OH} \rightarrow \text{HO}_2\cdot + \text{H}_2\text{O}$ | —                                                 | 3         |
| (4) | $\text{HO}_2\cdot \rightarrow \text{H}^+ + \text{O}_2^{\cdot -}$                           | —                                                 | 4         |

|      |                                                                                                |                   |   |
|------|------------------------------------------------------------------------------------------------|-------------------|---|
| (5)  | $\text{Fe(VI)}+\text{H}_2\text{O}_2 \rightarrow \text{Fe(IV)}+\text{O}_2$                      | 10                | 5 |
| (6)  | $\text{Fe(IV)}+\text{H}_2\text{O}_2 \rightarrow \text{Fe(II)}+\text{O}_2+\text{H}_2\text{O}$   | $\sim 10^4$       | 6 |
| (7)  | $\text{Fe(II)}+\text{H}_2\text{O}_2 \rightarrow \text{Fe(III)}+\cdot\text{OH}+\text{OH}^-$     | 63                | 7 |
| (8)  | $\text{Fe(IV)}+\text{Fe(II)} \rightarrow \text{Fe(V)}+\text{Fe(III)}$                          | $\sim 10^7$       | 1 |
| (9)  | $\text{Fe(III)}+\text{H}_2\text{O}_2 \rightarrow \text{Fe(II)}+\text{HO}_2^{\cdot}+\text{H}^+$ | $\sim 10^{-3}$    | 7 |
| (10) | $\text{Fe(V)}+\text{H}_2\text{O} \rightarrow \text{Fe(III)}+\text{H}_2\text{O}_2$              | $5.8 \times 10^7$ | 6 |
| (11) | $\text{Fe(V)}+\text{H}_2\text{O}_2 \rightarrow \text{Fe(III)}+\text{O}_2$                      | $5.6 \times 10^7$ | 8 |

**Table S4.** EEM spectrum volumes for reclaimed water.

|                | I        | II        | III       | IV        | V         | Total      |
|----------------|----------|-----------|-----------|-----------|-----------|------------|
| Feed water     | 454484.8 | 1092901.0 | 1473936.0 | 2163768.0 | 6699850.0 | 11884940.7 |
| UV             | 313760.5 | 848627.2  | 1515434.0 | 1796971.0 | 7951880.0 | 12426672.9 |
| Fe(VI)         | 680981.7 | 1634242.0 | 1834154.0 | 1329616.0 | 4883908.0 | 10362901.5 |
| UV/Fe(VI)-1    | 584346.3 | 1049324.0 | 1546057.0 | 1435953.0 | 6122653.0 | 10738333.6 |
| UV/Fe(VI)-2    | 373668.1 | 687577.0  | 1119804.0 | 1089391.0 | 4714690.0 | 7985130.7  |
| UV/Fe(VI)-3    | 358527.9 | 678085.3  | 1004926.0 | 861628.1  | 3726265.0 | 6629432.5  |
| Feed water-UF  | 395742.5 | 889558.0  | 1362587.0 | 1808721.0 | 6286827.0 | 10743435.0 |
| UV-UF          | 384300.4 | 819801.3  | 1506045.0 | 1657578.0 | 7634961.0 | 12002685.7 |
| Fe(VI)-UF      | 589085.5 | 1281834.0 | 1565213.0 | 1170434.0 | 4599610.0 | 9206176.67 |
| UV/Fe(VI)-1-UF | 435679.0 | 938212.2  | 1479270.0 | 1350966.0 | 5832885.0 | 10037012.8 |
| UV/Fe(VI)-2-UF | 315324.0 | 550372.4  | 1006746.0 | 946485.8  | 4467492.0 | 7286419.76 |
| UV/Fe(VI)-3-UF | 362353.3 | 599998.8  | 951266.8  | 866394.7  | 3713865.0 | 6493878.89 |

**Table S5.** 2D-COS results on the assignment and sign of each cross-peak.

| Position ( $\text{cm}^{-1}$ ) | Assignment          | Sign <sup>a</sup> |      |      |      |      |      |
|-------------------------------|---------------------|-------------------|------|------|------|------|------|
|                               |                     | 3600-3000         | 2965 | 1665 | 1420 | 1040 | 800  |
| 3600-3000                     | O-H                 | +                 | +(-) | +(+) | +(+) | +(+) | +(+) |
| 2965                          | C-H                 |                   | +    | +(+) | +(+) | +(+) | +(+) |
| 1665                          | C=O/NH <sub>2</sub> |                   |      | +    | +(-) | +(-) | +(-) |
| 1420                          | C-N                 |                   |      |      | +    | +(-) | +(-) |
| 1040                          | C-O-C/C-O           |                   |      |      |      | +    | +(+) |
| 800                           | C-O                 |                   |      |      |      |      | +    |

<sup>a</sup>Signs were obtained in the maps: +, positive; -, negative.

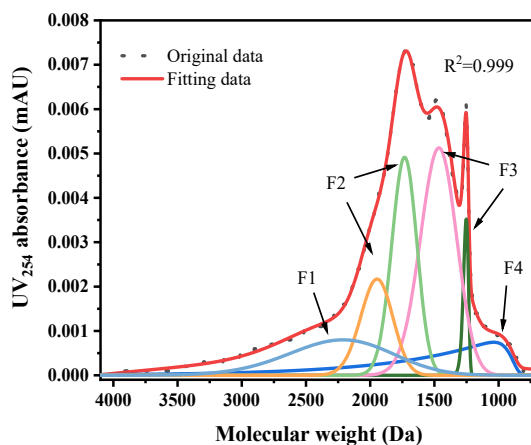

**Fig. S1** Peakfit deconvolution results of the feed water.

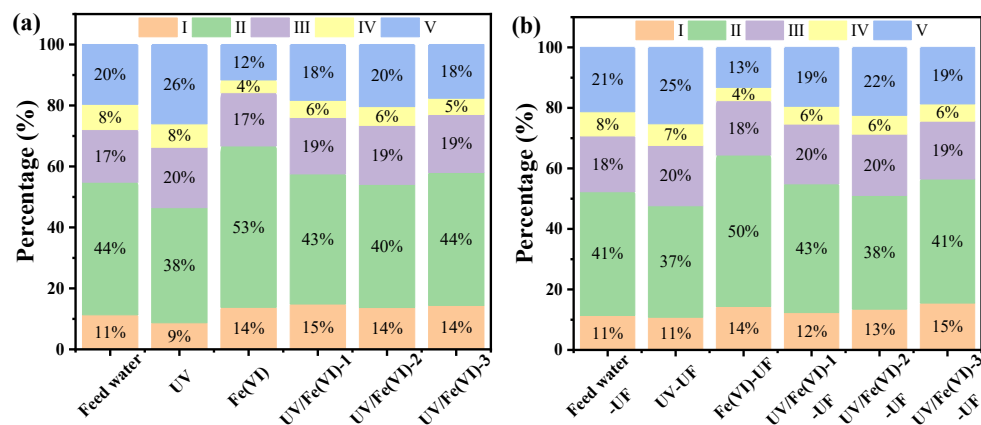

**Fig. S2** The proportion of various fluorescent components: influent water (a) and effluent water (b).

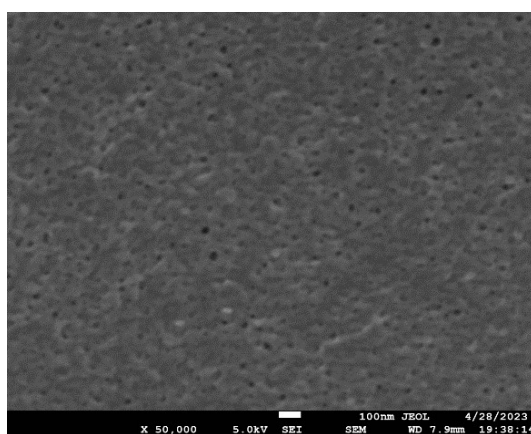

**Fig. S3** SEM images of virgin membrane.

## References

1. Z. Huang, L. Wang, Y. Liu, H. Zhang, X. Zhao, Y. Bai and J. Ma, *Water Res.*, 2021, **197**, 117094.
2. Y. Wan, P. Xie, Z. Wang, J. Ding, J. Wang, S. Wang and M. R. Wiesner, *Water Res.*, 2019, **158**, 213-226.
3. X. Tian, Y. Li, H. Xu, Y. Pang, J. Zhang and H. Pei, *J. Hazard. Mater.*, 2021, **412**, 125206.
4. X. Chang, T. Lin, J. Mo, H. Xu, H. Tao and W. Liu, *Chemosphere.*, 2021, **287**, 132049.
5. P. K. Rai, J. Lee, S. K. Kailasa, E. E. Kwon, Y. F. Tsang, Y. S. Ok and K. H. Kim, *Environ. Res.*, 2018, **160**, 420-448.
6. Y. Lee, R. Kissner and U. von Gunten, *Environ. Sci. Technol.*, 2014, **48**, 5154-5162.
7. K. Wei, X. Liu, S. Cao, H. Cui, Y. Zhang and Z. Ai, *Chem. Eng. J. Adv.*, 2021, **8**, 100165.
8. S. Wang, B. Shao, J. Qiao and X. Guan, *Front. Environ. Sci. Eng.*, 2020, **15**, 80.
